# Supplementary material
Source: PubMed Central journal article supplement (PMC2649383)
Supplement: pp.109.135293_1.pdf [file pp.109.135293_1.pdf]

**Supplemental Table S1.** ChloroP predictions of plastid targeting peptides in maize AGPase large subunit proteins.

| Name            | Length | Score | cTP | CS-<br>score | cTP-<br>length |
|-----------------|--------|-------|-----|--------------|----------------|
| P55241 (SH2)    | 516    | 0.432 | -   | 1.112        | 50             |
| ABD66656        | 505    | 0.560 | Y   | 4.915        | 57             |
| ACG34981        | 518    | 0.511 | Y   | 1.276        | 87             |
| P55234 (Embryo) | 521    | 0.510 | Y   | 1.478        | 47             |
