# Supplementary material
Source: PubMed Central journal article supplement (PMC2649383)
Supplement: pp.109.135293_3.pdf [file pp.109.135293_3.pdf]

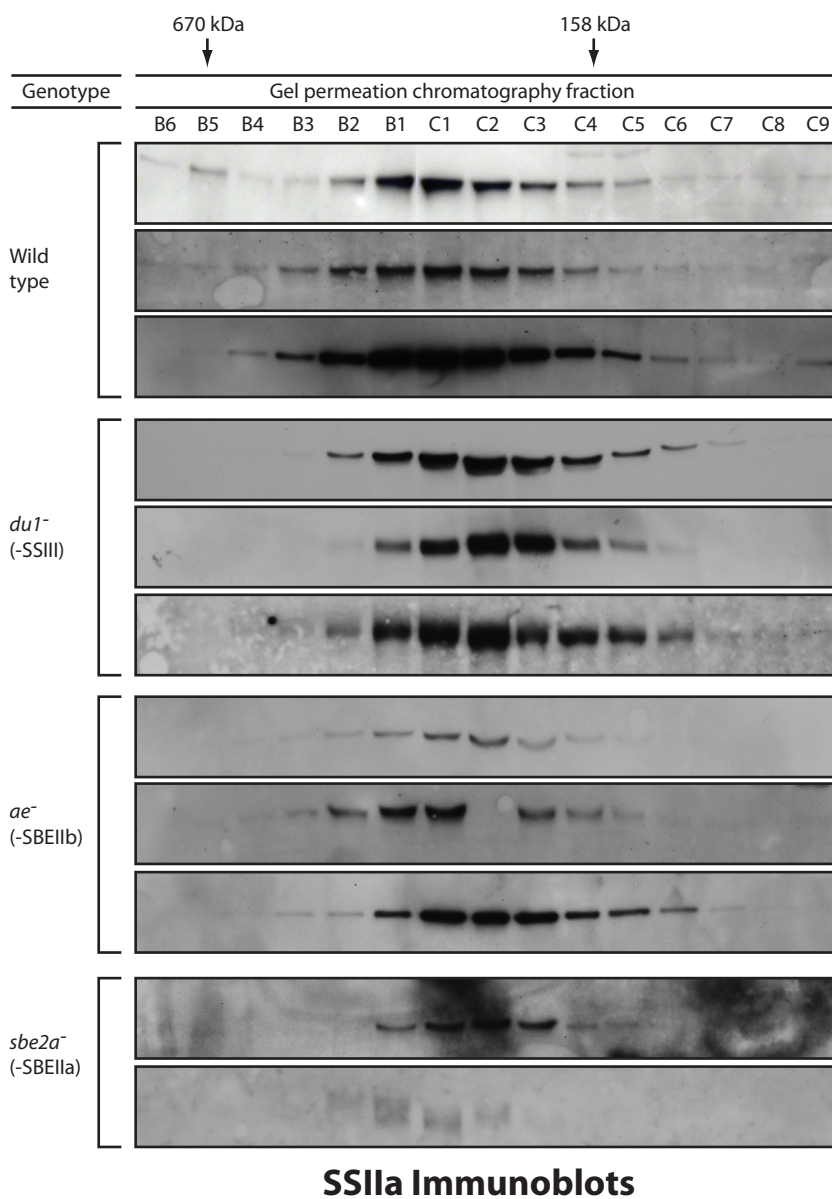

**Supplemental Figure S2.** Independent repetitions of GPC analyses of SSIIa in wild type and starch biosynthesis mutants. Details are as in Fig. 2. The multiple rows for each indicated genotype are from independent analyses beginning with separate amyloplast extracts.
