# Supplementary material
Source: PubMed Central journal article supplement (PMC2649383)
Supplement: pp.109.135293_4.pdf [file pp.109.135293_4.pdf]

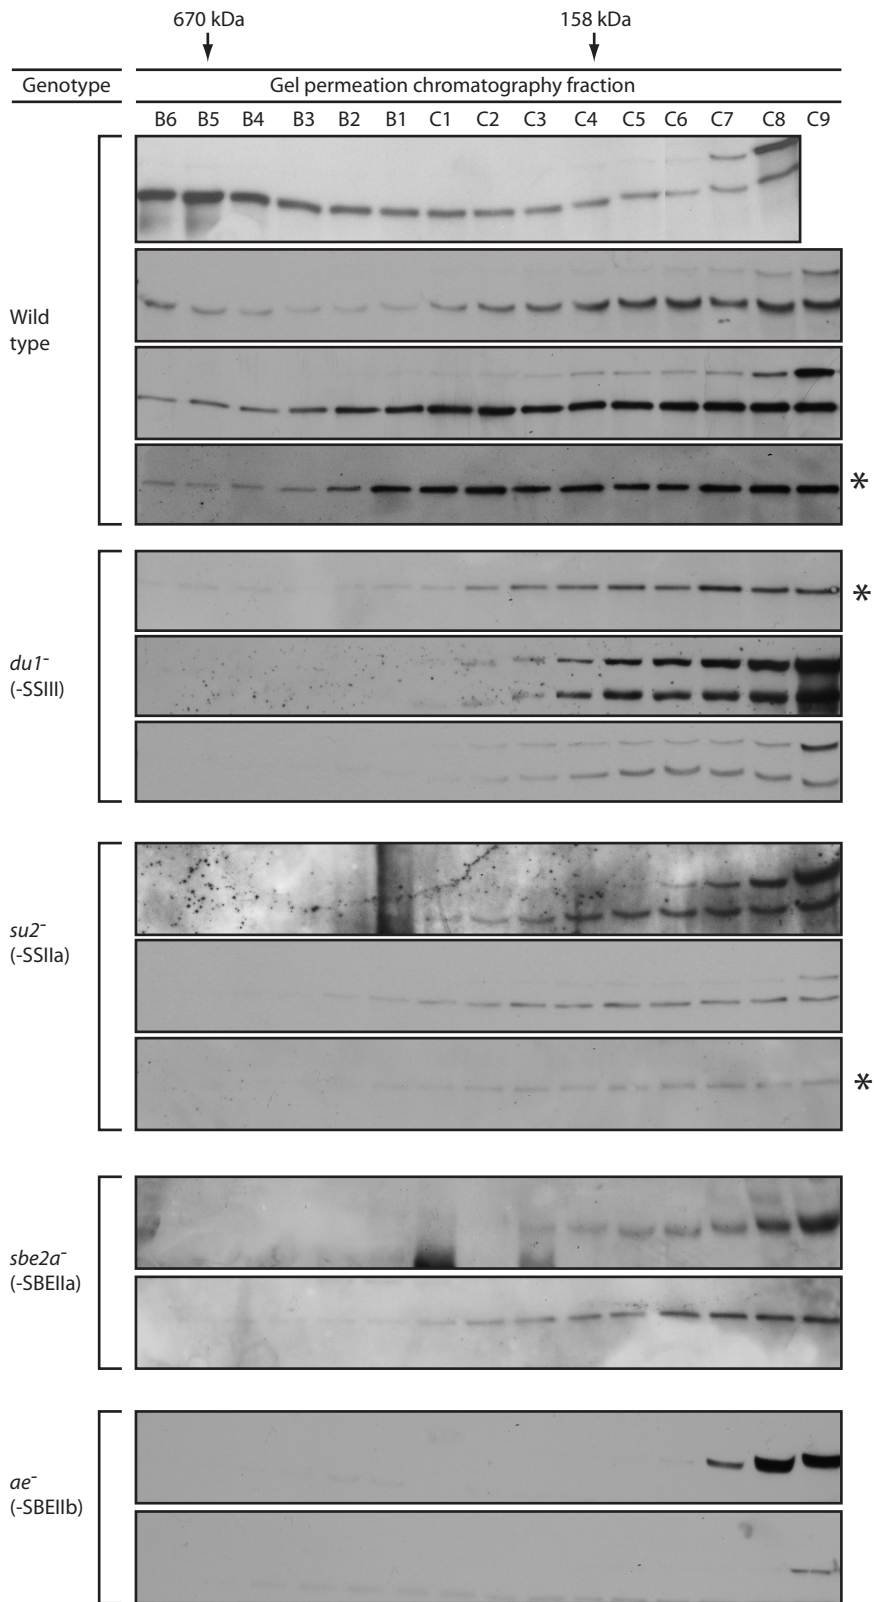

### SBEIIa and SBEIIb Immunoblots

**Supplemental Figure S3.** Independent repetitions of GPC analyses of SBEIIa and SBEIIb in wild type and starch biosynthesis mutants. Details are as in Fig. 2. The multiple rows for each indicated genotype are from independent analyses beginning with separate amyloplast extracts. Blots marked with asterisks were probed with the  $\alpha$ SBEIIb, specific for SBEIIb, and other blots were probed with  $\alpha$ SBEIIa/b, which recognizes both SBEIIa and SBEIIb. SBEIIa is the slower migrating protein. Bands shown in the *ae<sup>-</sup>* mutant are SBEIIa, and those in the *sbe2a<sup>-</sup>* mutant are SBEIIb.
