# Supplementary material
Source: PubMed Central journal article supplement (PMC2649383)
Supplement: pp.109.135293_7.pdf [file pp.109.135293_7.pdf]

Supplemental Figure S6; Alignment of maize AGPase large subunit isoforms and location of recovered peptides  
Page 1

```
ACG34981      MQFSSVLPLEGKACMSVRRGSGGYGSEMRINCCSIRRNKALRRMCFSA
P55234 (Embryo) MQFSSVLPLEGKACMSVRRGSGGYGSEMRINCCSIRRNKALRRMCFSA
P55241 (SH2)   MQFALALDTNSGPHQIRSCEGDGIDRLEKLSIGGR--KQEKALNRNRCFGG
ABD66656      MGLRVAATAPAPAGVVRVLGRCAA-----RVTTPRPAAVGG
* : . . . * . : .. ...

ACG34981      RGAVSSTQCVLTS DAGPDTLVVR-TSFRNYADPNEVAAVILGGGTGTQL
P55234 (Embryo) RGAVSSTQCVLTS DAGPDTLVVRPNHPFRNYADPNEVAAVILGGGTGTQL
P55241 (SH2)   R-VAATTQCILTS DACPETLHSQTQSSRKNYADANRVSAILGGGTGSQL
ABD66656      RRRFSVRMSVATTEATTTIavgASEDQALEARNsKTvvAVILGGGAGTRL
* : . : * : * . : : : * * : * * * * * : * : *

ACG34981      FPLTSTRATPAVPIGGCYRLIDIPMSNCFNSGINKIFVMTQFNsASLNRH
P55234 (Embryo) FPLTSTRATPAVPIGGCYRLIDIPMSNCFNSGINKIFVMTQFNsASLNRH
P55241 (SH2)   FPLTSTRATPAVPIGGCYRLIDIPMSNCFNSGINKIFVMSQFNSTSLNRH
ABD66656      FPLTRRRAKPAVPIGGAYRLIDVPMSNCINSGINKVYILTQFNsQSLNRH
**** * . * * * * * : * . * * * * * : * * * * * : * * * * * : * * * * *

ACG34981      IHRTY-LGGGINFTDGSVEVLAATQMPG-EAAGWFQGTADAVRKFIVWLE
P55234 (Embryo) IHRTY-LGGGINFTDGSVEVLAATQMPG-EAAGWFQGTADAVRKFIVWLE
P55241 (SH2)   IHRTY-LEGGINFADGSVQVLAATQMPG-EPAGWFQGTADSIRKFIVWLE
ABD66656      LSRAYDFSNGVAIGDGFVEVLAATQRPGETGKRWFQGTADAVRQFDWLF
: * : * : . : : * * * : * * * * * * * * * * * : * : * * : * :

ACG34981      DYYKHKAIEHILILSGDQLYRMDYMELVQKHVDDNADITLSCAPVGESRA
P55234 (Embryo) DYYKHKAIEHILILSGDQLYRMDYMELVQKHVDDNADITLSCAPVGESRA
P55241 (SH2)   DYYSHKSIDNIVILSGDQLYRMYMELVQKHVEDDADITISCAPVDESRA
ABD66656      DAKS-KDIEDVLILSGDHLRYRMDYMDVFQSHRQRGAGISICCLPIDGSRA
* . * * : : : * * * * * : * * * * * : * * * * * : * * * * *

ACG34981      SDYGLVKFDSSGRVIQFSEKPKGAAL EEMKVDTSFLNFAIDS-PAEYPYI
P55234 (Embryo) SDYGLVKFDSSGRVIQFSEKPKGAAL EEMKVDTSFLNFATCTLPAEYPYI
P55241 (SH2)   SKNGLVKIDHTGRVLQFFEKPKGADLNSMRVETNFLSYAIDD-AQKYPYL
ABD66656      SDFGLMKIDDTGRVISFSEKPKGDELKAMQVDTTVLGLSKEE-AENKPYI
* . * * : * * : * * * * * * * : * * : * * * * * : . : * * : * * :

ACG34981      ASMGVYVFKRDVLLDLLKSRYAELHDFGSEILPKALHEHNVQAYVFTDYW
P55234 (Embryo) ASMGVYVFKRDVLLDLLKSRYAELHDFGSEILPKALHEHNVQAYVFTDYW
P55241 (SH2)   ASMGYVFKKDALLDLLKSKYTQLHDFGSEILPRAVL DHSVQACIFGTGYW
ABD66656      ASMGYIYFKKDILLNLLRWRFP TANDFGSEIIPASAKEIDVKAYLFNDYW
* * * * * : * * * * * * * : : . : * * * * * * * : : . * * : * * * *

ACG34981      EDIGTIRSFFDANMALCEQPPKFEFYDPKTPFFTS PRYL PPTKSDKCRK
P55234 (Embryo) EDIGTIRSFFDANMALCEQPPKFEFYDPKTPFFTS PRYL PPTKSDKCRK
P55241 (SH2)   EDVGTIKSFFDANLALTEQPSKFD FYDPKTPFFTAPRCLPPTQLDKCKMK
ABD66656      EDIGTIKSF FEANLALAEQPPRF SFYDADKPMYTSRRNL PPSMVNNSKIT
* * : * * * : * * * : * * * * * : * * * * * . * * * * : : : : .

ACG34981      DAIISHGCFLRECAIEHSIVGVR SRLNSGCELKNTMMM GADLYETEDEIS
P55234 (Embryo) DAIISHGCFLRECAIEHSIVGVP SRLNSGCELKNTMMM GADLYETEDEIS
P55241 (SH2)   YAFISDGCLLRECNI EHSVIGVCSRVS SGCELKDSVMM GADTYETEE EAS
ABD66656      DSIISHGCFLDNCRIEHSVVGVR SRIGSNVHLKDTVML GADY YETAVERG
: * * * * * : * * * * * : * * * * * . * * * * * : * * * * * * * *
```

```

ACG34981          RLLAEGKVPIGVGENTKISNCIIDMNARVGRNVSITNKEG-VQEADRPDE
P55234 (Embryo)  RLLAEGKVPIGVGENTKISNCIIDMNCQGWKERLHNKQRGRSKSPDRPGR
P55241 (SH2)     KLLLAGKVPVGIGRNTKIRNCIIDMNARIGKNVVINSKG--IQEADHPEE
ABD66656         ELLAEGKVPIGIGENTTIQKCIIDKNARIGKKVVISNSEG-VDEADRTSE
                .**  *****:*.***.* :***** *.:  ::  ...  ...*:. .

ACG34981          GYYIRSGIVVVLKNATIKDGTVI
P55234 (Embryo)  RILIRSGIVVVLKNATIKDGTVI
P55241 (SH2)     GYYIRSGIVVILKNATINDGSVI
ABD66656         GFYIRSGITVVLKNAIADGLVI
                *****.*:***** * ** **

```

**Supplemental Figure S6.** Alignment of maize AGPase large subunit isoforms and location of recovered peptides. Maize AGPase large subunit isoforms identified by Genbank accession number were aligned using the program CLUSTALW. Characterized isoforms are the product of the *sh2* gene (P55241)<sup>1,2</sup> and the embryo-expressed isoform (P55234)<sup>3</sup>. Two additional putative AGPase large subunit homologs have been identified by genomic or cDNA sequence but are not yet characterized (ACG34981, ABD66656). Yellow highlighted residues indicate peptide sequences from proteins that associate with starch biosynthetic enzymes (see Supplemental Table S1 for details). All the recovered peptides are specific to the SH2 isoform. Green highlighted residues indicate predicted plastid targeting peptides according to ChloroP.

### References

1. Bhave, MR, Lawrence, S, Barton, C, Hannah, LC. (1990) Identification and molecular characterization of shrunken-2 cDNA clones of maize. *Plant Cell* **2**, 581-588.
2. Shaw, JR, Hannah, LC. (1992) Genomic nucleotide sequence of a wild-type *shrunken-2* allele of *Zea mays*. *Plant Physiol* **98**, 1214-1216.
3. Giroux, M, Smith-White, B, Gilmore, V, Hannah, LC, Preiss, J. (1995) The large subunit of the embryo isoform of ADP glucose pyrophosphorylase from maize. *Plant Physiol* **108**, 1333-1334.
