# Supplementary material
Source: PubMed Central journal article supplement (PMC2649383)
Supplement: pp.109.135293_9.pdf [file pp.109.135293_9.pdf]

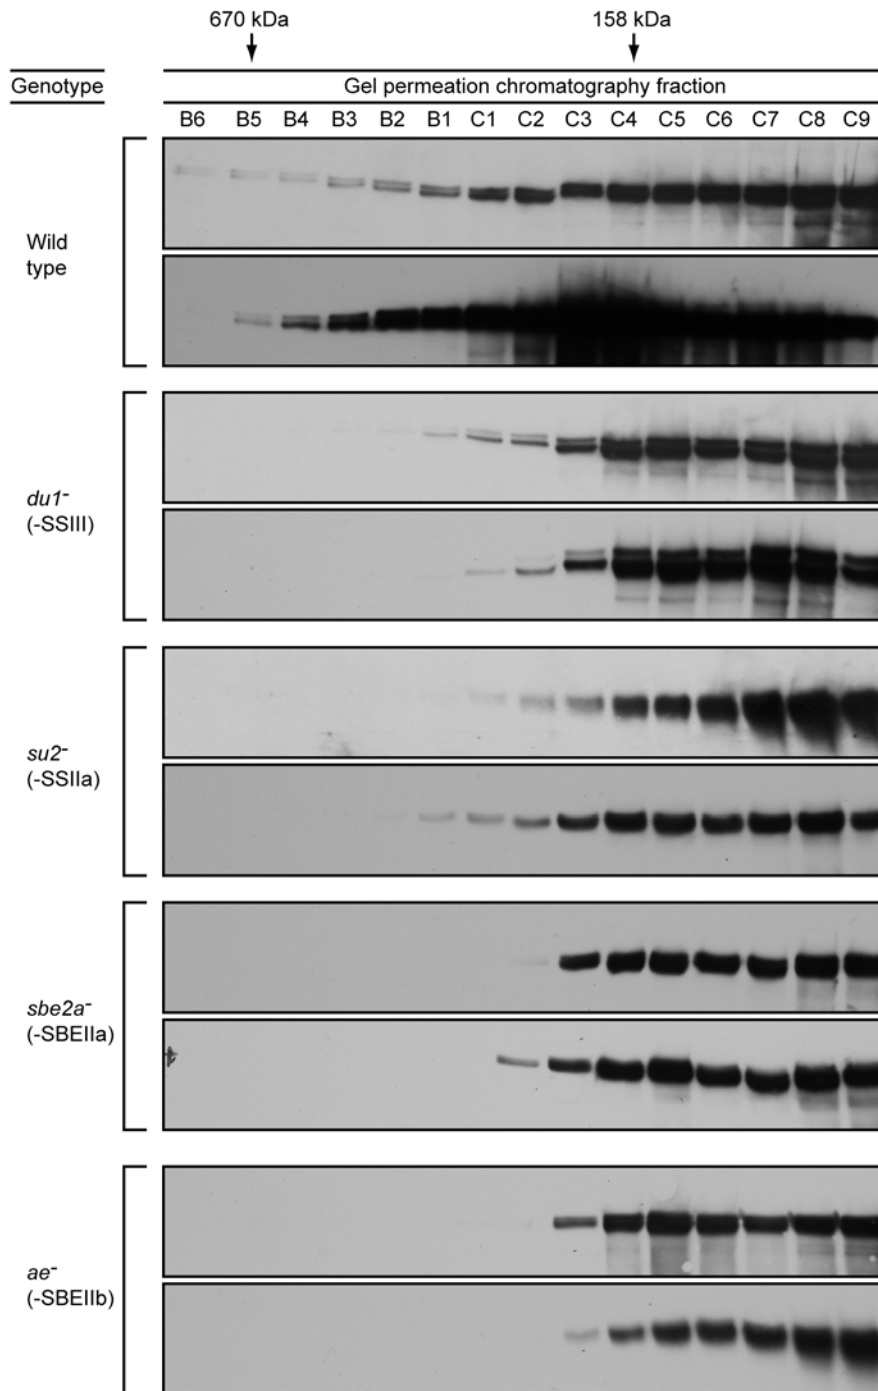

### PPDK Immunoblots

**Supplemental Figure S8.** Independent repetitions of GPC analyses of PPDK in wild type and starch biosynthetic enzyme mutants. Details are as in Fig. 8. The multiple rows for each indicated genotype are from independent analyses beginning with separate amyloplast extracts.
