# Supplementary material
Source: PubMed Central journal article supplement (PMC2649383)
Supplement: pp.109.135293_10.pdf [file pp.109.135293_10.pdf]

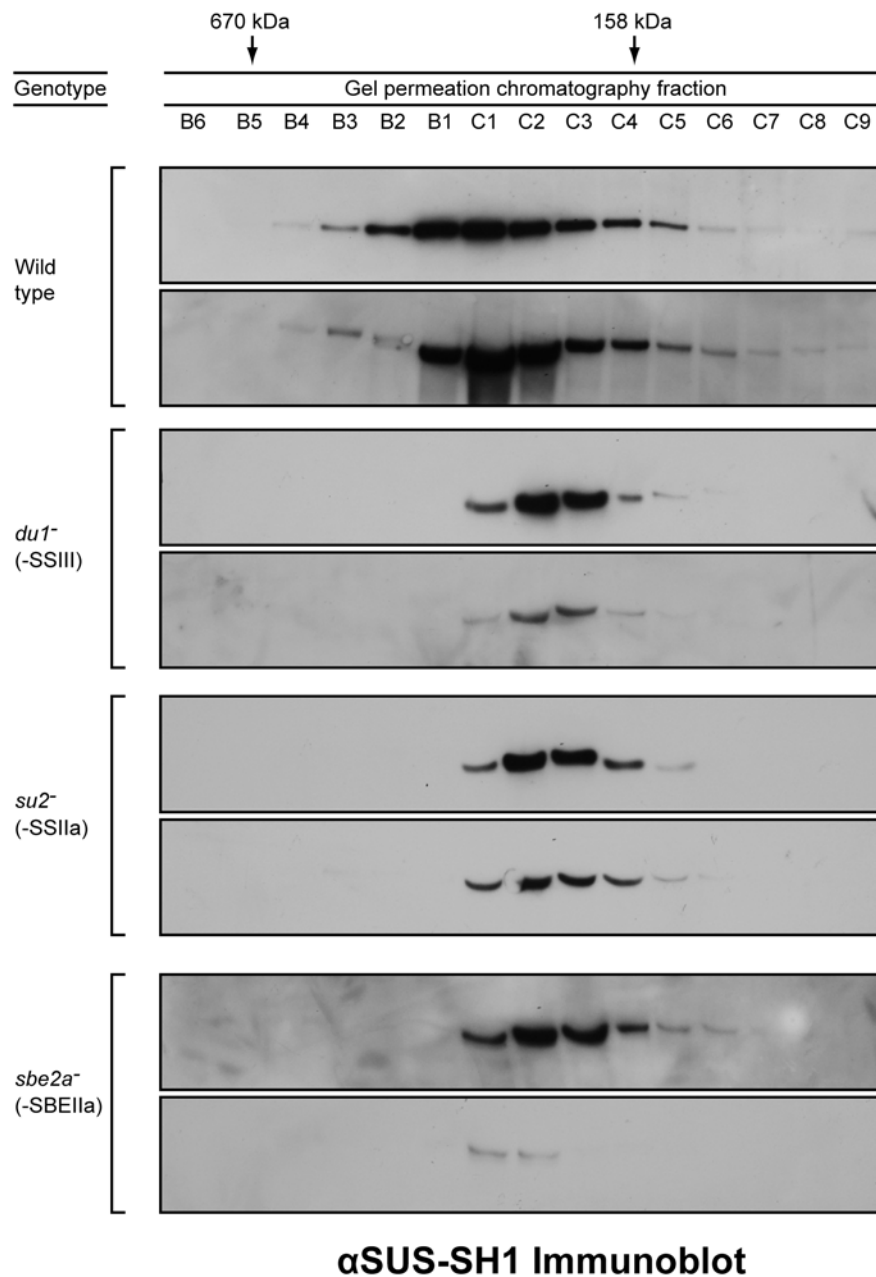

**Supplemental Figure S9.** Independent repetitions of GPC analyses of SUS-SH1 in wild type and starch biosynthetic enzyme mutants. Details are as in Fig. 8. The multiple rows for each indicated genotype are from independent analyses beginning with separate amyloplast extracts.
